# Supplementary material for: Prevalence of spontaneous movement disorders (dyskinesia, parkinsonism, akathisia and dystonia) in never-treated patients with chronic and first-episode psychosis: a systematic review and meta-analysis
Source: HighWire-hosted journal article supplement (doi:10.1136/bmjment-2024-301184), 2024-01-01
Supplement: bmjment-2024-301184supp004_data_supplement.pdf [file bmjment-2024-301184supp004_data_supplement.pdf]

# Double Arcsine Transformed Prevalence Proportion (SP)

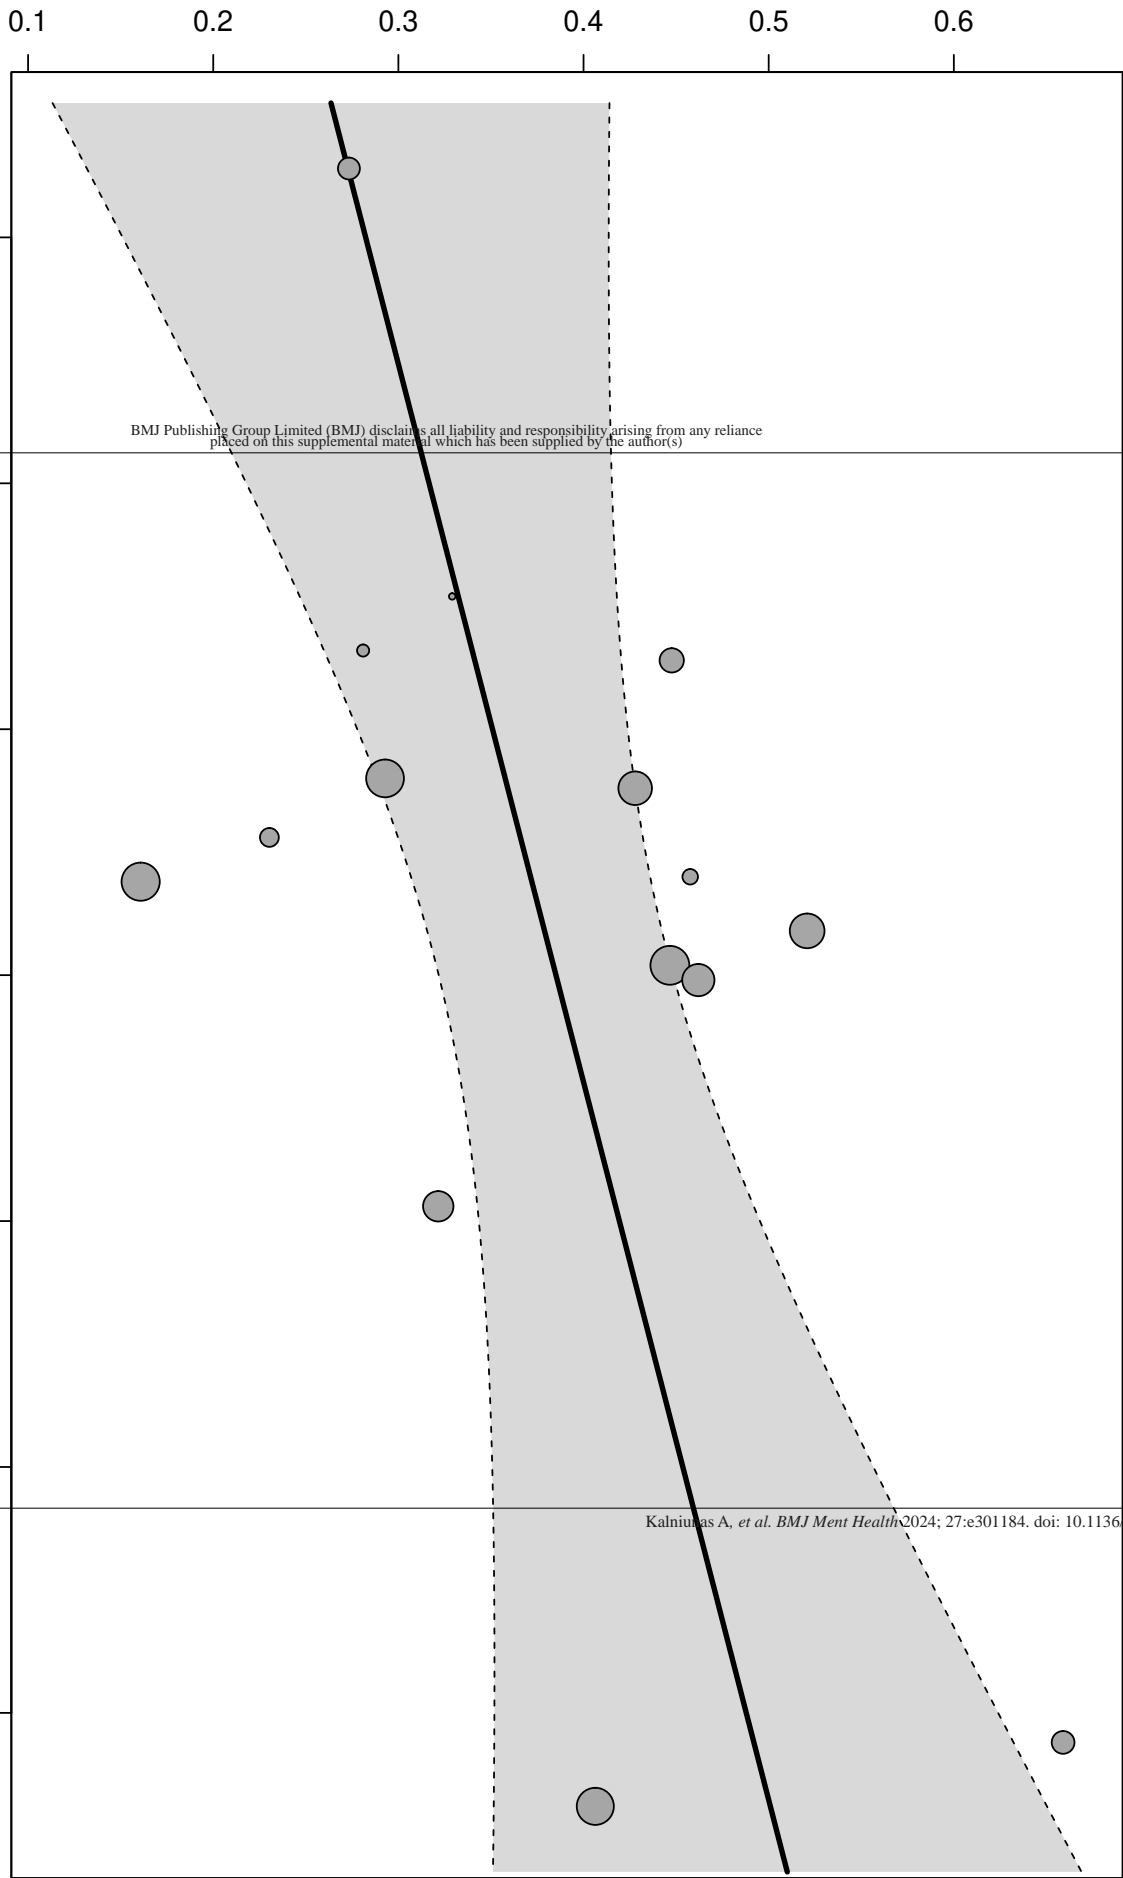

Supplemental material

BMJ Publishing Group Limited (BMJ) disclaims all liability and responsibility arising from any reliance placed on this supplemental material which has been supplied by the author(s)

BMJ Ment Health

Kalniunas A, et al. *BMJ Ment Health* 2024; 27:e301184. doi: 10.1136/bmjment-2024-301184
